# Supplementary material for: Construction and optimization of efficient glucose–xylose co-fermenting yeast Yarrowia lipolytica for green and sustainable succinic acid production from lignocellulosic biomass
Source: Royal Society of Chemistry journal article supplement (doi:10.1039/d4gc04189e), 2024-11-22
Supplement: d4gc04189e1.pdf [file d4gc04189e1.pdf]

## Supplementary Information

### **Construction and optimization of efficient glucose-xylose co-fermenting yeast *Yarrowia lipolytica* for green and sustainable succinic acid production from lignocellulosic biomass**

Mianshen Ge<sup>a, b, #</sup>, Yuanyuan Sha<sup>a, b, #</sup>, Minrui Lu<sup>a, b</sup>, Yuwei Zhang<sup>a, b</sup>, Zhaoxian Xu<sup>a, b</sup>,  
Sitong Chen<sup>a, b</sup>, Ying Ding<sup>a, b</sup>, Mingjie Jin<sup>a, b, \*</sup>

<sup>a</sup> School of Environmental and Biological Engineering, Nanjing University of Science and Technology, Nanjing 210094, PR China

<sup>b</sup> Biorefinery Research Institution, Nanjing University of Science and Technology, Nanjing 210094, PR China

\*Corresponding author: Prof. Mingjie Jin, E-mail address: [jinmingjie@njust.edu.cn](mailto:jinmingjie@njust.edu.cn)

# These authors contributed equally to this work.

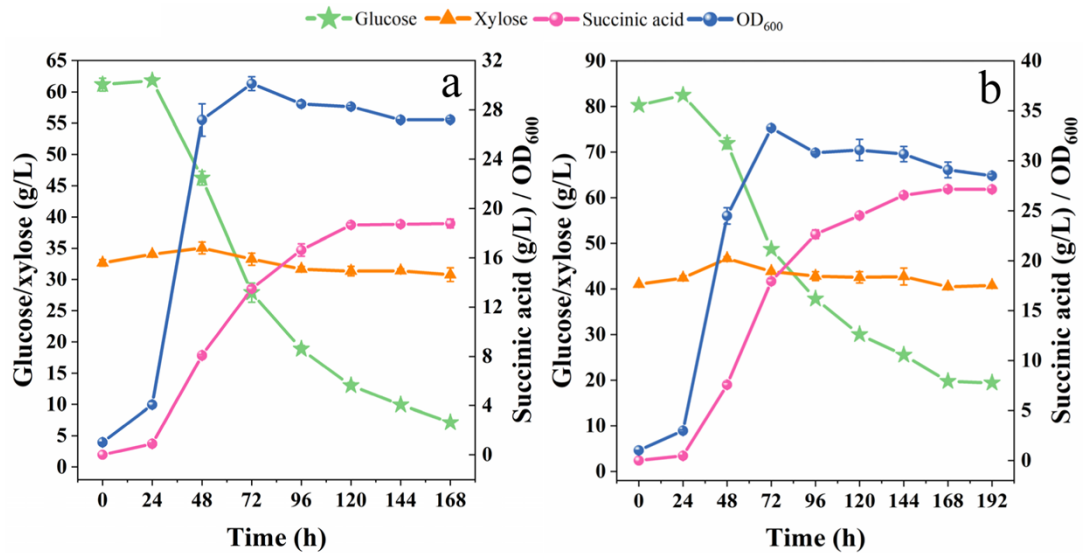

Fig. S1 Time-course profiles of sugar consumption, cell growth (OD<sub>600</sub>), SA production during shake flask culture of *Y. lipolytica* BAS4332 on YPD60X30 (a) and YPD80X40 (b) medium.

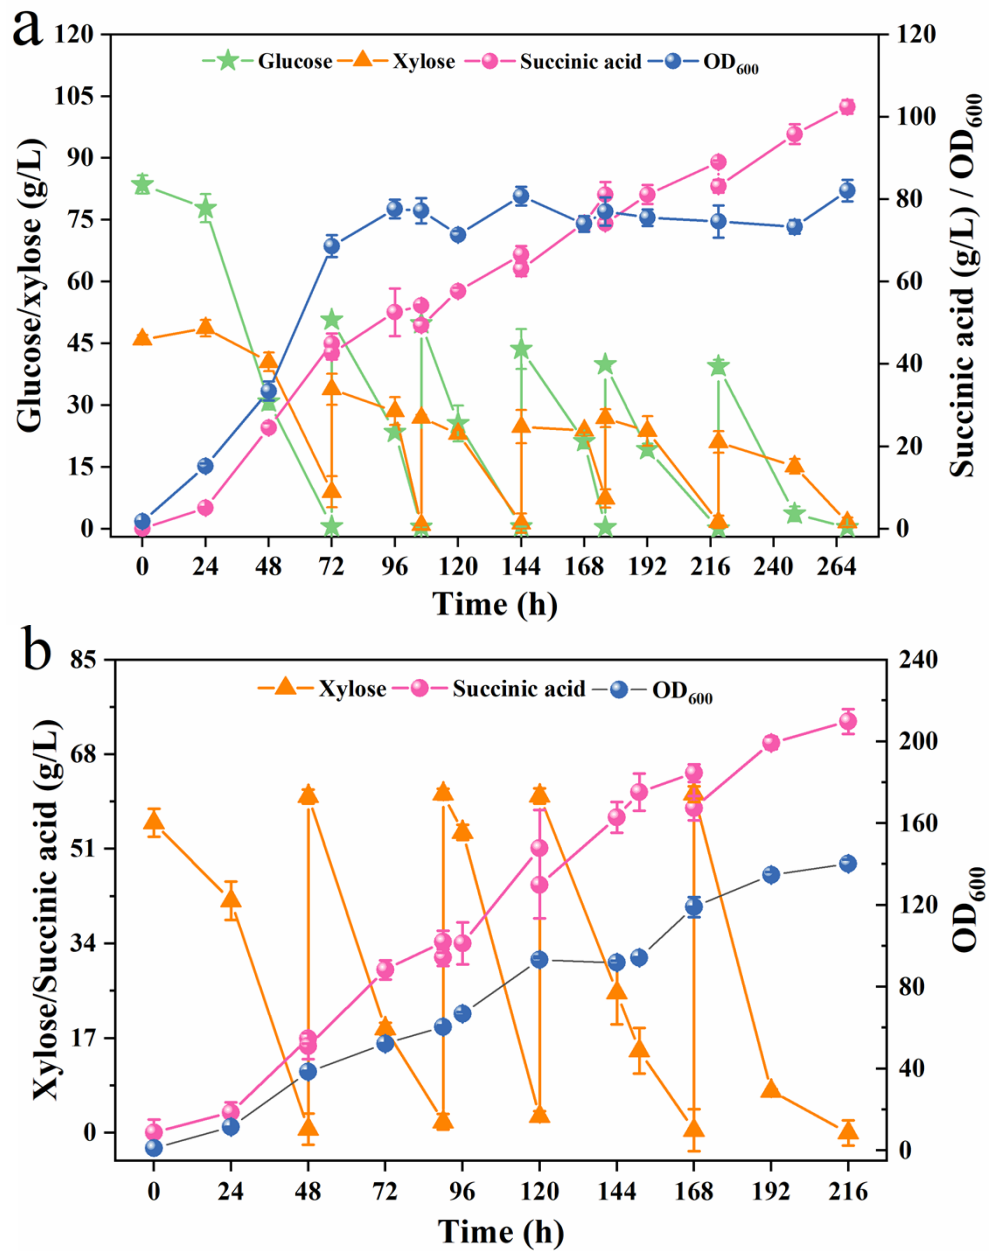

Fig. S2 Fed-batch fermentation profile of engineered *Y. lipolytica* strain BDic5 using glucose-xylose mixture (a) or pure xylose (b) as carbon resources in shake flasks.

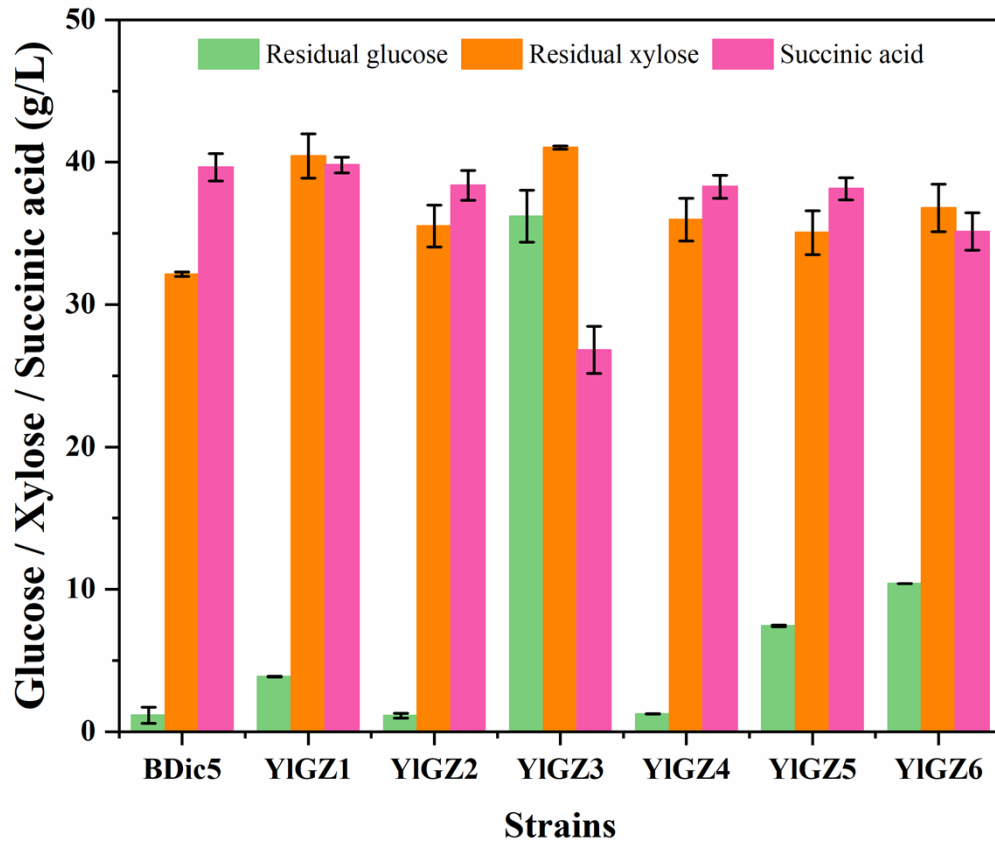

Fig. S3 Sugar consumption and SA production after 72 h of fermentation with different strains. Strains YIGZ1-6 represent overexpressing the *Yht1-6* genes in *Y. lipolytica* BDic5.

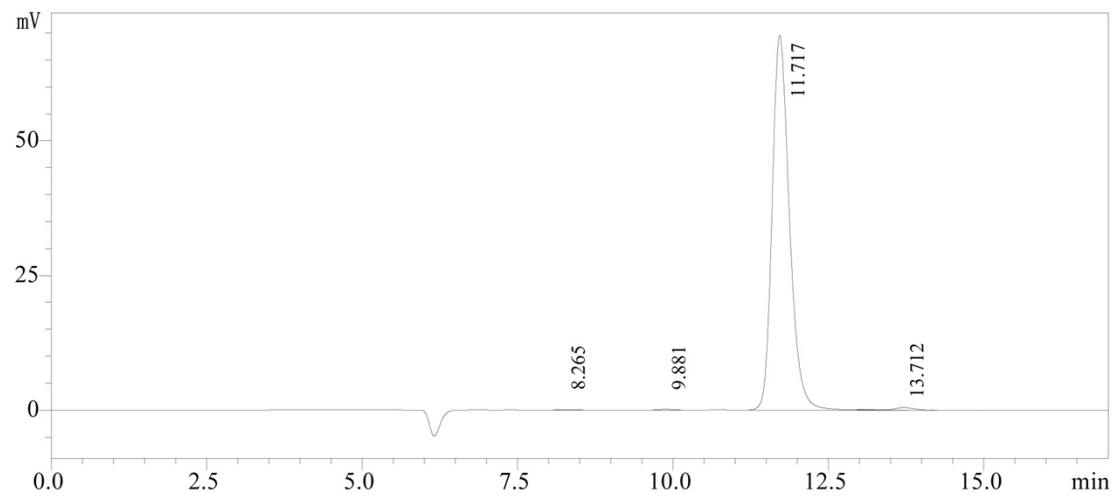

Fig. S4 HPLC chromatogram for recoverd SA from fermentation broth.

Table S1 Sugar concentrations and main inhibitors present in DLCA(sa)-CS hydrolysates with different solid loading.

| Solid loading | Glucose (g/L) | Xylose (g/L) | Formic acid (g/L) | Acetic acid (g/L) | Hydroxymethylfurfural (g/L) | Furfural (g/L) | Levulinic acid (g/L) | Phenols (g/L) |
|---------------|---------------|--------------|-------------------|-------------------|-----------------------------|----------------|----------------------|---------------|
| 20%           | 70.49 ± 0.12  | 40.02 ± 0.25 | 0.39 ± 0.02       | 1.86 ± 0.05       | 0.56 ± 0.04                 | N. A           | 1.47 ± 0.05          | 0.84 ± 0.04   |
| 25%           | 84.90 ± 0.24  | 57.22 ± 0.34 | 0.46 ± 0.03       | 2.21 ± 0.06       | 0.69 ± 0.09                 | N. A           | 1.64 ± 0.05          | 0.99 ± 0.05   |
| 30%           | 103.91 ± 0.39 | 70.97 ± 0.08 | 0.55 ± 0.02       | 2.65 ± 0.08       | 0.80 ± 0.08                 | N. A           | 1.84 ± 0.06          | 1.18 ± 0.06   |
| 35%           | 124.50 ± 0.29 | 85.39 ± 0.64 | 0.66 ± 0.04       | 3.14 ± 0.08       | 0.94 ± 0.07                 | N. A           | 1.96 ± 0.10          | 1.41 ± 0.07   |

N. A: data not available

Table S2 Primers used in this study for gene expression and deletion.

| Primers  | Primer sequences (5'-3')                                        | Functions                         |
|----------|-----------------------------------------------------------------|-----------------------------------|
| UP-Sdh-F | AGTGAATTATTTAAATGCCACAAGTTTGCATCTA<br>TTCTGTACATT               | <i>YISdh5</i> deletion            |
| UP-Sdh-R | CACCACTGGAAGATCCGGGAATTCGTTTAAACG<br>CAGGTCGGTTTCGA             | <i>YISdh5</i> deletion            |
| DN-Sdh-F | TTAATTAAGGTACCAAGCTTGCGGCCGCTGCTGT<br>CGCGATACGCCAA             | <i>YISdh5</i> deletion            |
| DN-Sdh-R | TATTTAAATGCATGCGGCTCTGGCCAGATTGGG<br>GATTAAGGATGAC              | <i>YISdh5</i> deletion            |
| UP-Ach-F | ACGACGGCCAGTGAATTATTTAAATGCTATTCTT<br>ACGGTGTACAGTTACG          | <i>YIAch</i> deletion             |
| UP-Ach-R | ACCACTGGAAGATCCGGGAATTCGTTTAAACTG<br>TGTGAGATGGGGTAGTAC         | <i>YIAch</i> deletion             |
| DN-Ach-F | ACAGCTTAATTAAGGTACCAAGCTTGCGGCCGC<br>ACACTATATAAGAATGTATTTATTTT | <i>YIAch</i> deletion             |
| DN-Ach-R | ACAGCTATGACCATGATTACGCCAAGCTATTTA<br>AATGACGCGAGTAGGTTGACTCATA  | <i>YIAch</i> deletion             |
| Pck-F    | TTTTTGCAGTACTAACCGCAGATGTCCCCTTCTA<br>AAATGAATG                 | amplification of<br><i>ScPck</i>  |
| Pck-R    | GTGACATAACTAATTACATGATTACTCGAATTGA<br>GGACCAGCG                 | amplification of<br><i>ScPck</i>  |
| Scs-F    | TTTTTGCAGTACTAACCGCAGATGTTTTTCGCGAA<br>TTGCTGCTCGATCTCGAGCTGTT  | amplification of <i>YIScs</i>     |
| Ses-R    | AGGCCATGGAGGTACCTGGATCCTAAAGCTTTA<br>AAGAGGCAGCTCAAAGGAGACG     | amplification of <i>YIScs</i>     |
| Dic-F    | GCAGTACTAACCGCAGATGTCATCTTTACAAAA<br>ACACTTACCCATGGAGAGCAA      | amplification of <i>YIDic</i>     |
| Dic-R    | GCGTGACATAACTAATTACATGACTAATGTTCGC<br>ATTCCAATCTTGTAGAACTGA     | amplification of <i>YIDic</i>     |
| Mae-F    | TGCAGTACTAACCGCAGATGACCACACCTCAAC<br>CACGAGCAATGA               | amplification of<br><i>YIMae</i>  |
| Mae-R    | GCGTGACATAACTAATTACATGATTACTGCTCCA<br>AAGGATCAGTTT              | amplification of<br><i>YIMae</i>  |
| Yht1-F   | GCAGTACTAACCGCAGATGGGACTCGCTAACAT<br>CATCAACCGTG                | amplification of<br><i>YIYht1</i> |
| Yht1-R   | GGCAACGTGGGGACAGGCCATGGACTAGACAG<br>ACTCAATGTAGA                | amplification of<br><i>YIYht1</i> |
| Yht2-F   | TTTGCAGTACTAACCGCAGATGGCCATTATTGTG                              | amplification of                  |

---

|        |                                                             |                                   |
|--------|-------------------------------------------------------------|-----------------------------------|
|        | GCTGTATTTGTGGCTTTTGGGA                                      | <i>YIYht2</i>                     |
| Yht2-R | GCAAGACCGGCAACGTGGGGACAGGCCATGGA<br>CTAATCCGAATCAAATCCAGAAT | amplification of<br><i>YIYht2</i> |
| Yht3-F | GCAGTACTAACCGCAGATGTCCACTAGTGCTAT<br>GACCGACGATT            | amplification of<br><i>YIYht3</i> |
| Yht3-R | CAACGTGGGGACAGGCCATGGACTAAGAGGACT<br>CGGAGAAGT              | amplification of<br><i>YIYht3</i> |
| Yht4-F | GCAGTACTAACCGCAGATGGCGAGGCTTTGTCT<br>TTCTCAAACGG            | amplification of<br><i>YIYht4</i> |
| Yht4-R | GGGGACAGGCCATGGATTAAACAGTCTCGGTGT<br>ACTGAGGATG             | amplification of<br><i>YIYht4</i> |
| Yht5-F | GCAGTACTAACCGCAGATGTACAAGGTCCATAA<br>CCCCTACCTCA            | amplification of<br><i>YIYht5</i> |
| Yht5-R | TGGGGACAGGCCATGGATTAGACATGCTCAGTT<br>CCAGGATACTG            | amplification of<br><i>YIYht5</i> |
| Yht6-F | GCAGTACTAACCGCAGATGATTGGAAACGCTCA<br>AATTAACCAGG            | amplification of<br><i>YIYht6</i> |
| Yht6-R | GTGGGGACAGGCCATGGATTACAATTGAGAGGG<br>AGGGGCGTC              | amplification of<br><i>YIYht6</i> |
| Glk-F  | TTTGCAGTACTAACCGCAGATGACAATCACTCTG<br>AGTCAGAAGGT           | amplification of <i>YIGlk</i>     |
| Glk-R  | GACAGGCCATGGACTATGAGTCGTCCGGGTAAG<br>CAGCCAAGG              | amplification of <i>YIGlk</i>     |
| Hxk-F  | GCAGTACTAACCGCAGATGGTTCATCTTGGTCCC<br>CGAAAACCCC            | amplification of<br><i>YIHxk</i>  |
| Hxk-R  | GGGGACAGGCCATGGACTAAATATCGTACTTGA<br>CACCGGGCTT             | amplification of<br><i>YIHxk</i>  |

---
